# Supplementary material for: Co-evolution of Friendships and Antipathies: A Longitudinal Study of Preschool Peer Groups
Source: PubMed Central journal article supplement (PMC5052272; doi:10.3389/fpsyg.2016.01509), 2016-10-06
Supplement: DataSheet1.pdf [file DataSheet1.pdf]

## Supplementary Material

# Co-evolution of positive and negative networks: A longitudinal study of preschool peer groups

João R. Daniel\*, António J. Santos, Marta Antunes, Marília Fernandes, Brian E. Vaughn

\* Correspondence: jdaniel@ispa.pt

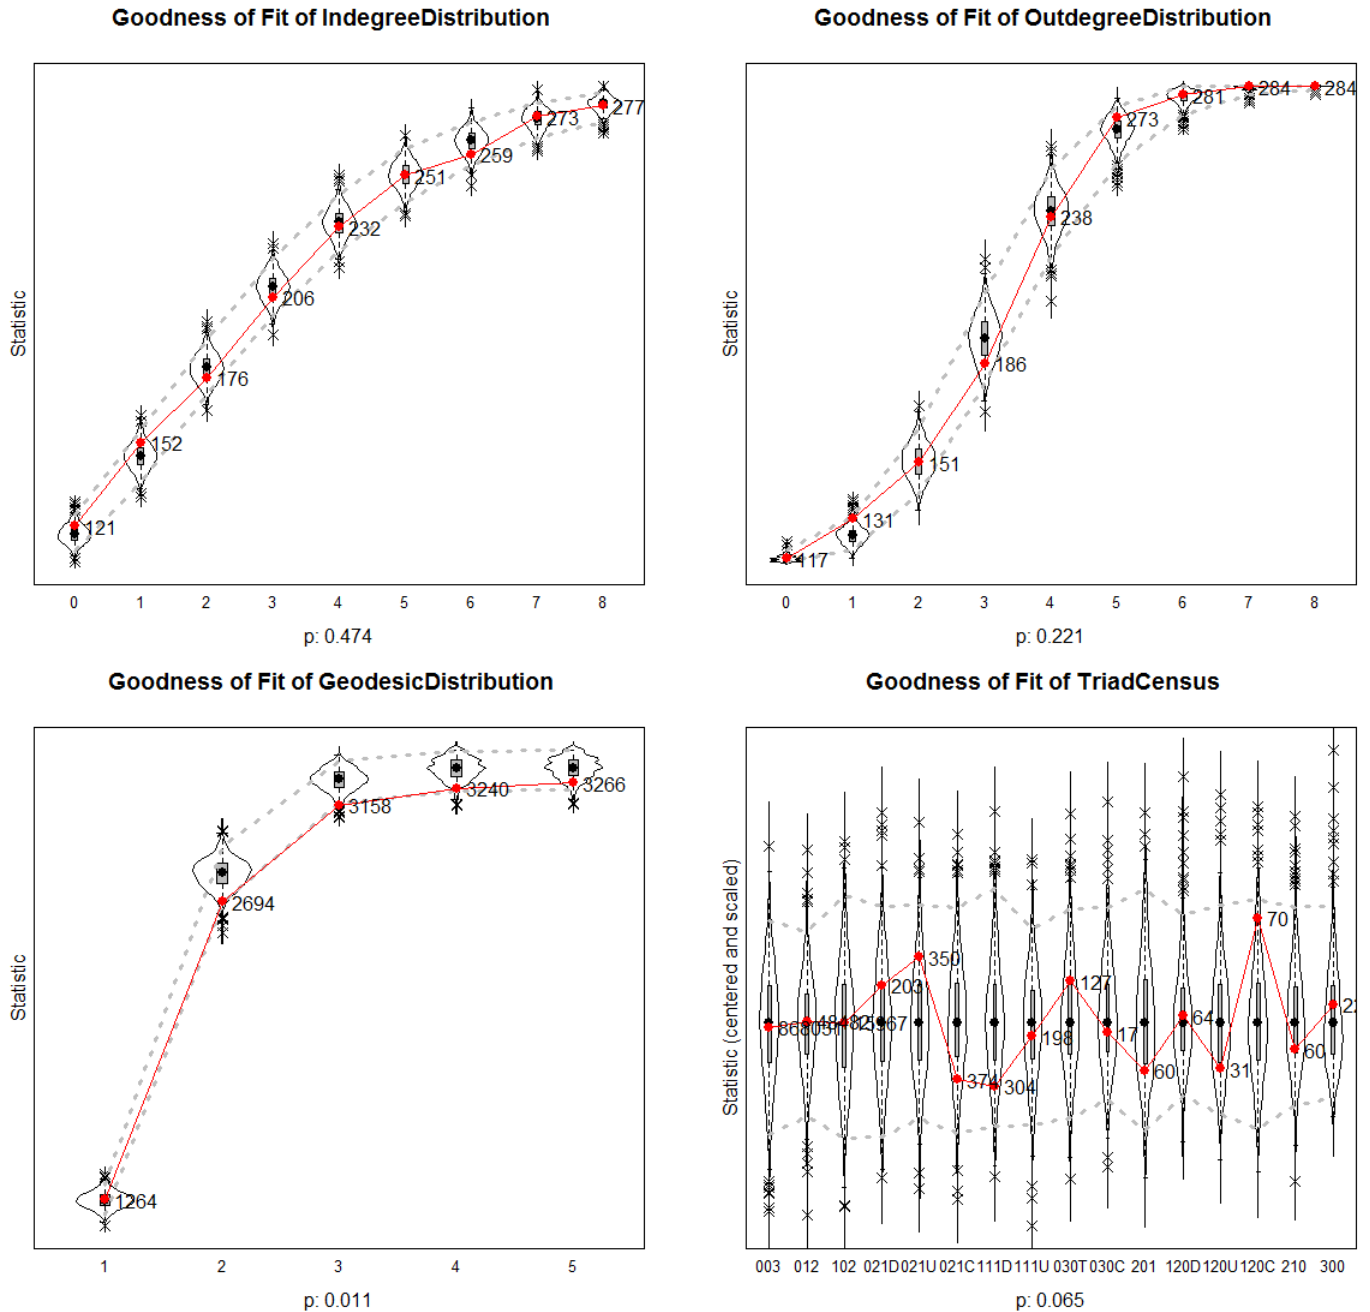

Supplementary Figure 1. Goodness of fit statistics for the univariate friendship network model

**Goodness of Fit of IndegreeDistribution**

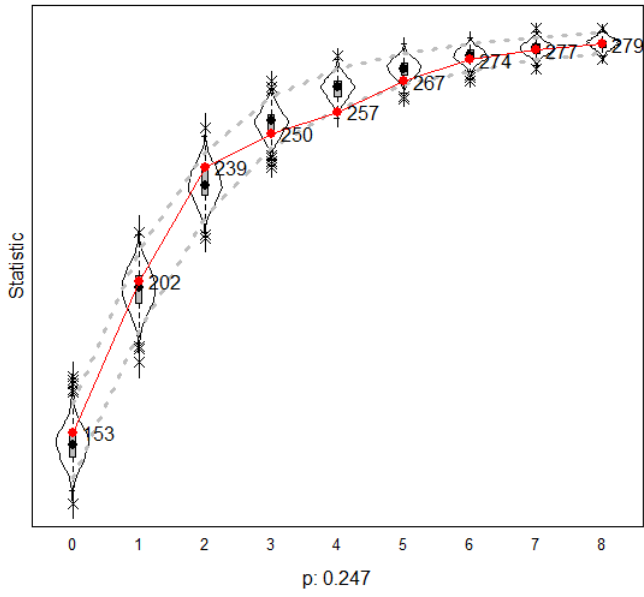

**Goodness of Fit of OutdegreeDistribution**

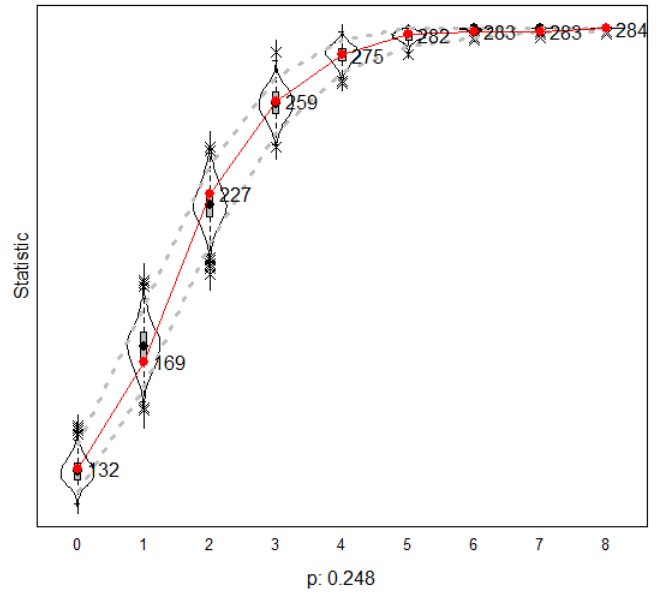

**Goodness of Fit of GeodesicDistribution**

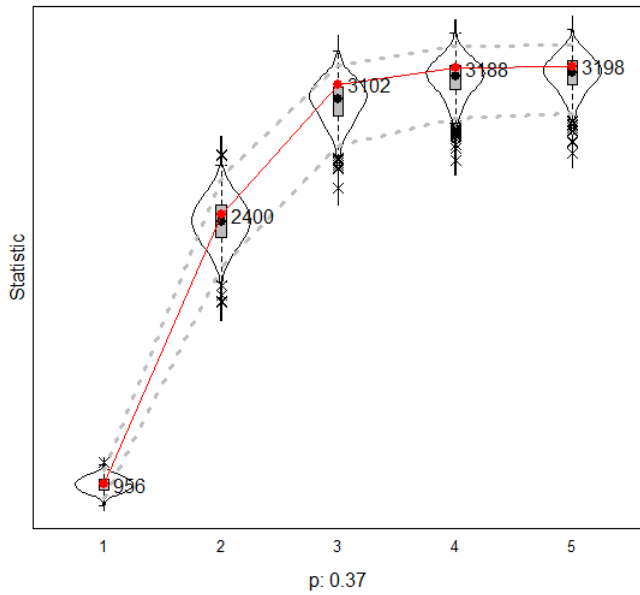

**Goodness of Fit of TriadCensus**

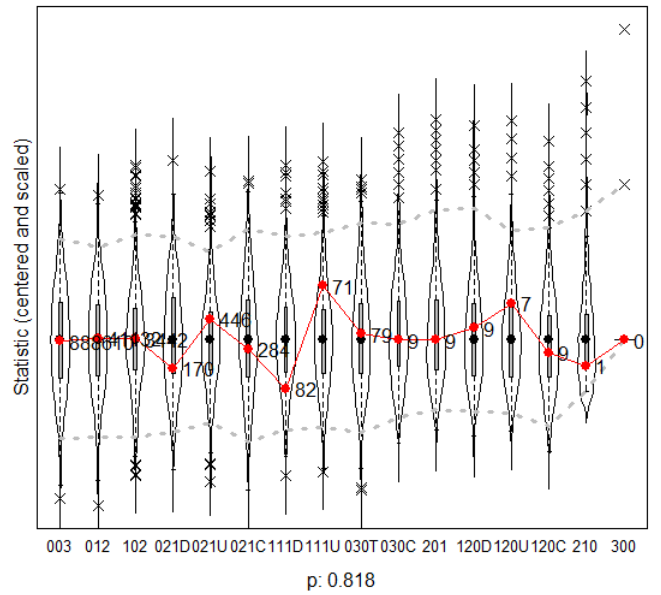

Supplementary Figure 2. Goodness of fit statistics for the univariate antipathy network model

**Goodness of Fit of IndegreeDistribution**

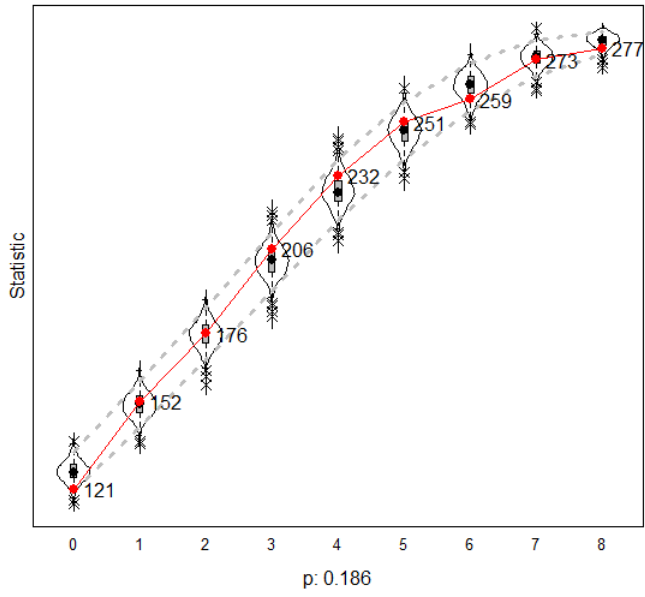

**Goodness of Fit of OutdegreeDistribution**

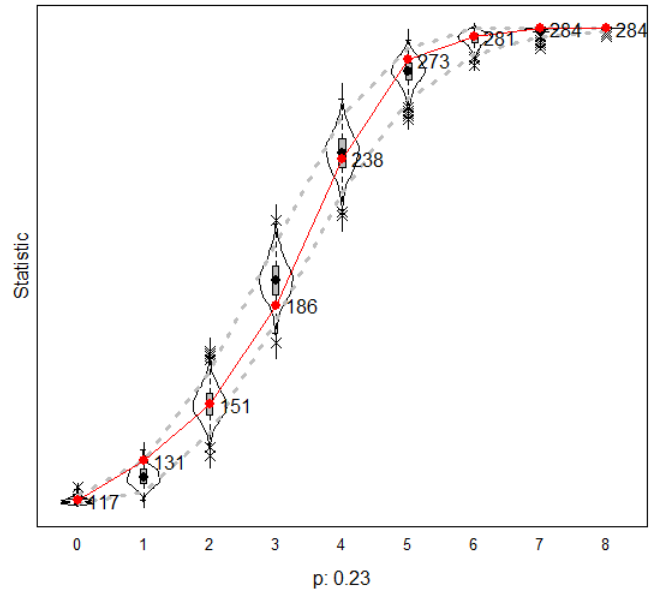

**Goodness of Fit of GeodesicDistribution**

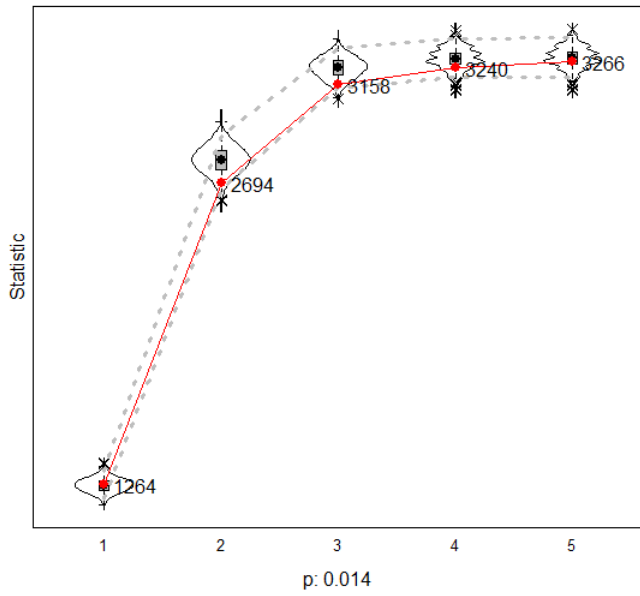

**Goodness of Fit of TriadCensus**

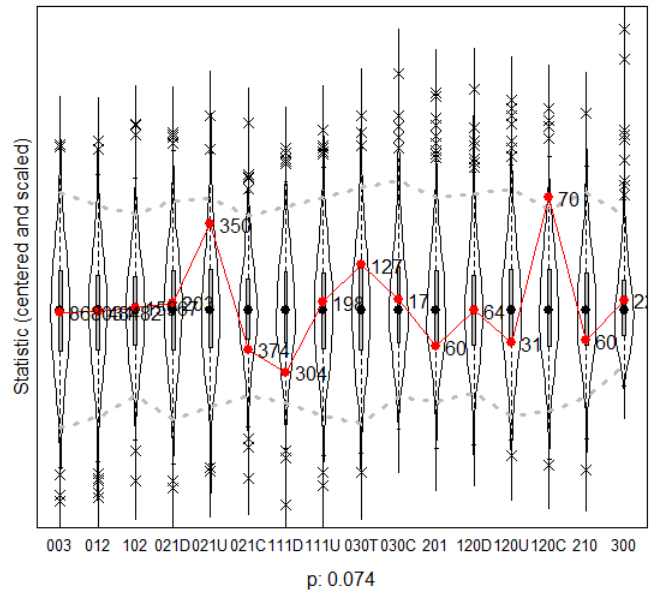

Supplementary Figure 3. Goodness of fit statistics for the multivariate model: Friendship network

**Goodness of Fit of IndegreeDistribution**

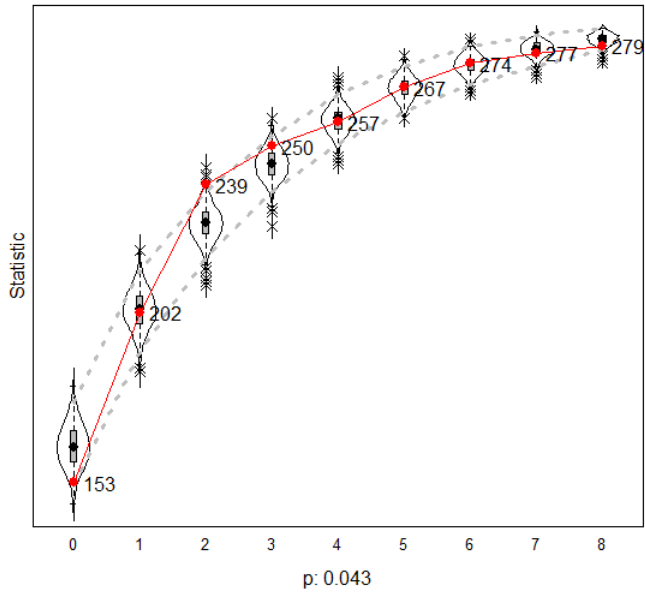

**Goodness of Fit of OutdegreeDistribution**



**Goodness of Fit of GeodesicDistribution**

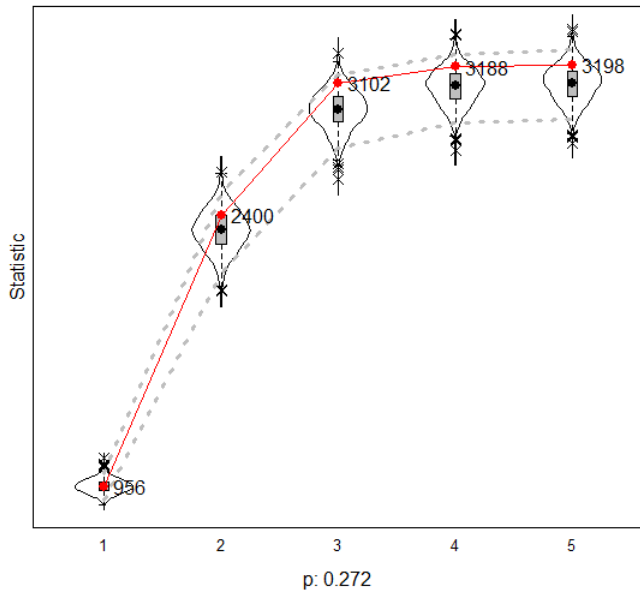

**Goodness of Fit of TriadCensus**

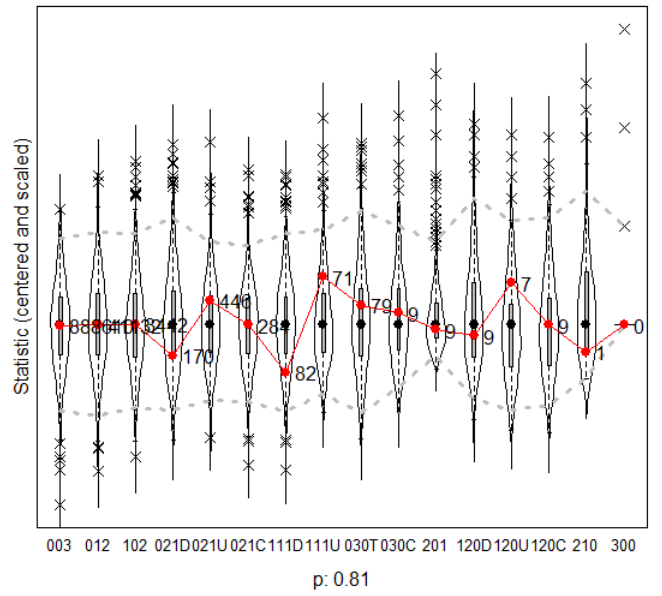

Supplementary Figure 4. Goodness of fit statistics for the multivariate model: Antipathy network

Supplementary Table 1. Multivariate triadic estimates ( $\beta$ ) and standard Errors (SE) in simplified multivariate models

| Parameter                                             | $\beta$ | SE  |
|-------------------------------------------------------|---------|-----|
| <i>Degree-related network effects</i>                 |         |     |
| 17. Friendship popularity on antipathy popularity (-) | -.12    | .07 |
| 18. Antipathy popularity on friendship popularity (+) | -.13    | .10 |
| 19. Friendship activity on antipathy activity (-)     | -.05    | .17 |
| 20. Antipathy activity on friendship activity (+)     | -.01    | .08 |
| <i>Triadic network effects</i>                        |         |     |
| 21. Friends agreement (-)                             | .31     | .28 |
| 22. Reinforced animosity (-)                          | .13     | .12 |
| 23. Shared enemy (+)                                  | .23     | .17 |
| 24. Enemy of my enemy #1 (+)                          | -.08    | .30 |
| 25. Enemy of my enemy #2 (+)                          | .37     | .38 |
| 26. Forced friends (+)                                | -.09    | .20 |

*Note.* For brevity only multivariate effects' estimates are presented; estimates came from 10 different models (only one multivariate triadic effect per model); + and – signs following multivariate effects' names indicate whether friendship (+) or antipathy (-) ties were considered the dependent tie;; overall maximum convergence ratios < .25 and *t* statistics for deviations from targets < .10 in absolute value for all models; all *p* values of the joint significance test of time heterogeneity were *ns*.
